# Supplementary material for: Para-Aortic Lymph Node Dissection for Patients with Node-Negative Cervical Squamous Cell Carcinoma: A Retrospective Cohort Study
Source: Hindawi journal article supplement (doi:10.1155/2022/5025451), 2022-11-08
Supplement: f1 [file 5025451.f1.zip]

Archive with 3 entries (3 files):
- Fig-S1.pdf
- Fig-S2.pdf
- Supplementary Files.docx
