# Supplementary material for: Para-Aortic Lymph Node Dissection for Patients with Node-Negative Cervical Squamous Cell Carcinoma: A Retrospective Cohort Study
Source: Hindawi journal article supplement (doi:10.1155/2022/5025451), 2022-11-08
Supplement: f1 [file 5025451.f1.zip › Supplementary Files.docx]

**Table S1. Site of first tumor recurrence**

| Site | - PALND | + PALND | *P* Value |
| --- | --- | --- | --- |
| Locoregional recurrence | 6 (21.4%) | 10 (26.3%) | 0.774 |
| Distant metastasis | 22 (78.6%) | 28 (73.7%) |


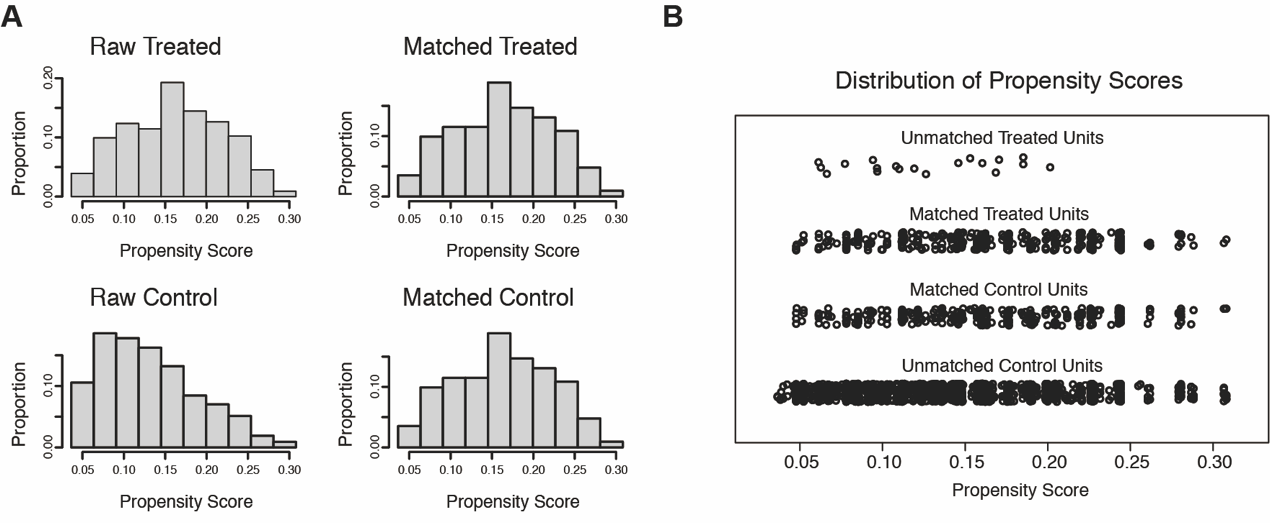
**Fig S1.** Propensity scores of different groups (A). Distribution of the propensity scores (B).


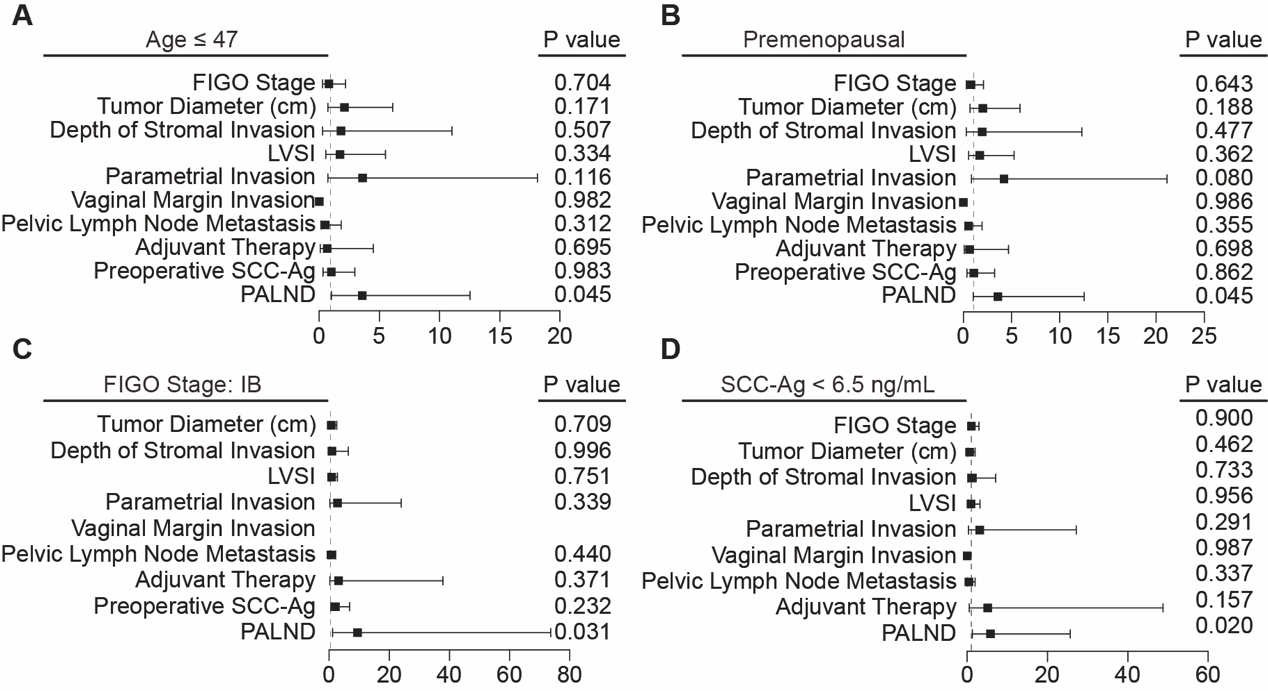
**Fig S2.** Multivariate analysis of clinicopathological factors for OS in patients aged ≤47 years (A), patients who were premenopausal (B), patients with FIGO stage IB (C), and patients with SCC-Ag<6.5 ng/mL (D).
