# Supplementary figures and images for: Para-Aortic Lymph Node Dissection for Patients with Node-Negative Cervical Squamous Cell Carcinoma: A Retrospective Cohort Study
Source: Hindawi journal article supplement (doi:10.1155/2022/5025451), 2022-11-08

**A**Age  $\leq 47$ 

P value

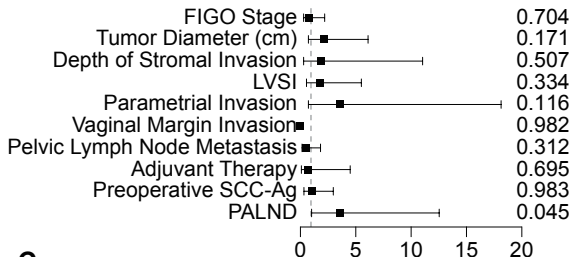**B**

Premenopausal

P value

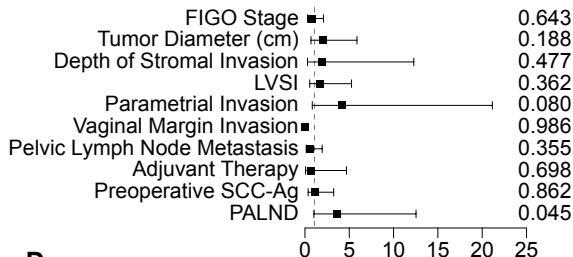**C**

FIGO Stage: IB

P value

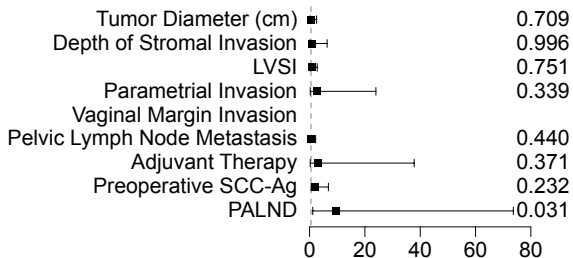**D**SCC-Ag  $< 6.5$  ng/mL

P value

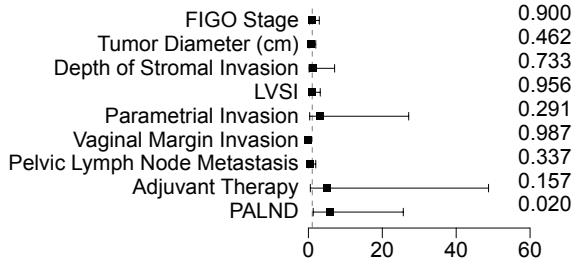

Supplement: f1 [file 5025451.f1.zip]

**A**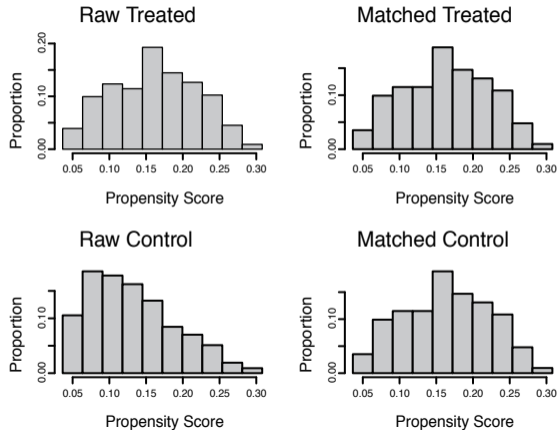**B**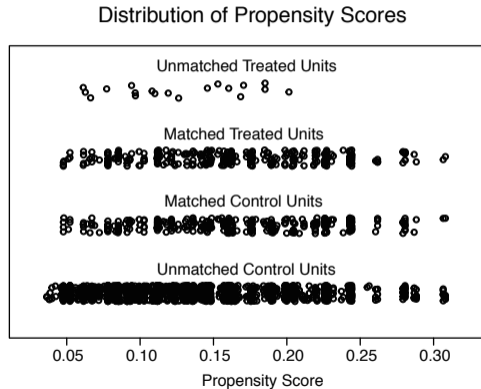

Supplement: f1 [file 5025451.f1.zip › Fig-S1.pdf]
